# Supplementary material
Source: PubMed Central journal article supplement (PMC9378502)
Supplement: NIHMS1817919-supplement-1.pdf [file NIHMS1817919-supplement-1.pdf]

## Supplemental Figure 1.

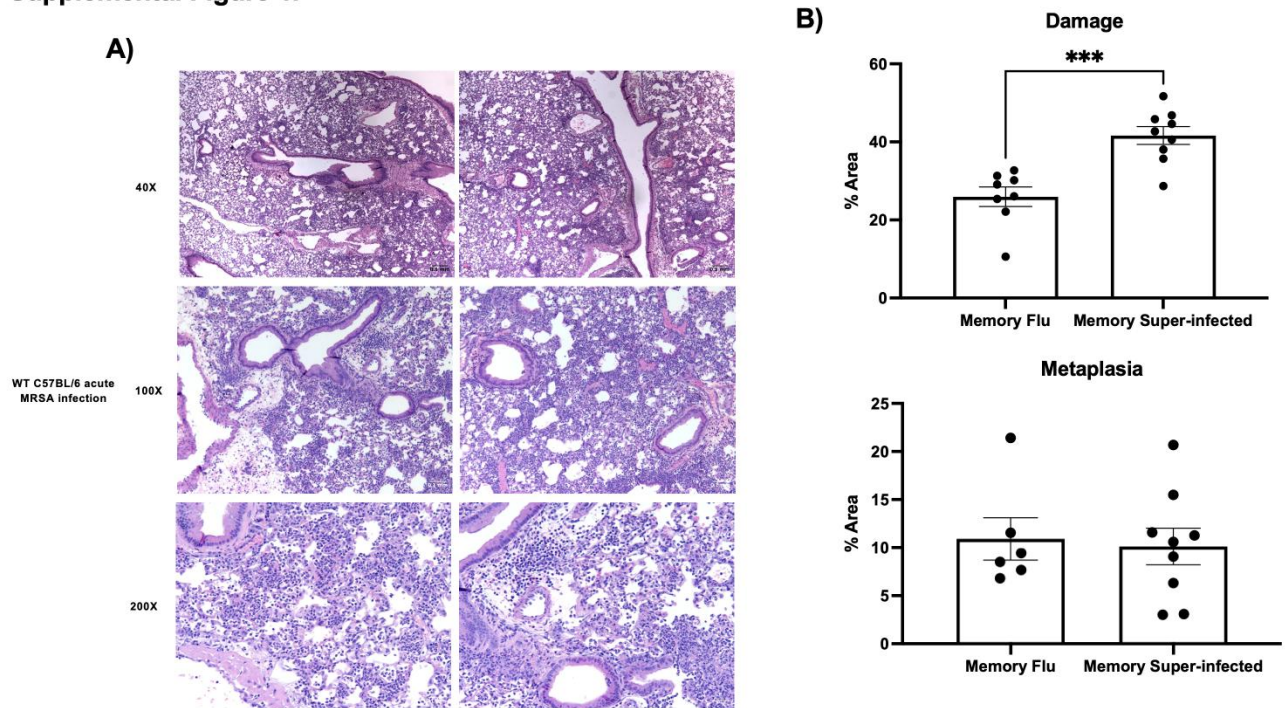

**Supplemental Figure 1 Visualization of lung damage MRSA alone infected mice and quantification of damage and metaplasia in memory experienced mice.** A) Representative histology sections of acute (n=2) and memory (n=2) influenza infected WT C57BL/6 mice from formalin inflated mouse lungs stained with H&E at 40X, 100X, and 200X. B) Percent of damage and metaplasia in influenza alone and super-infected memory groups quantified by calculating thresholds of damaged areas and areas of metaplasia using Fiji software (influenza n=8, super-infected n=9). p values: \*<0.05, \*\*<0.01 \*\*\*<0.001, \*\*\*\*<0.0001.

**Supplemental Figure 2.**

**A)**

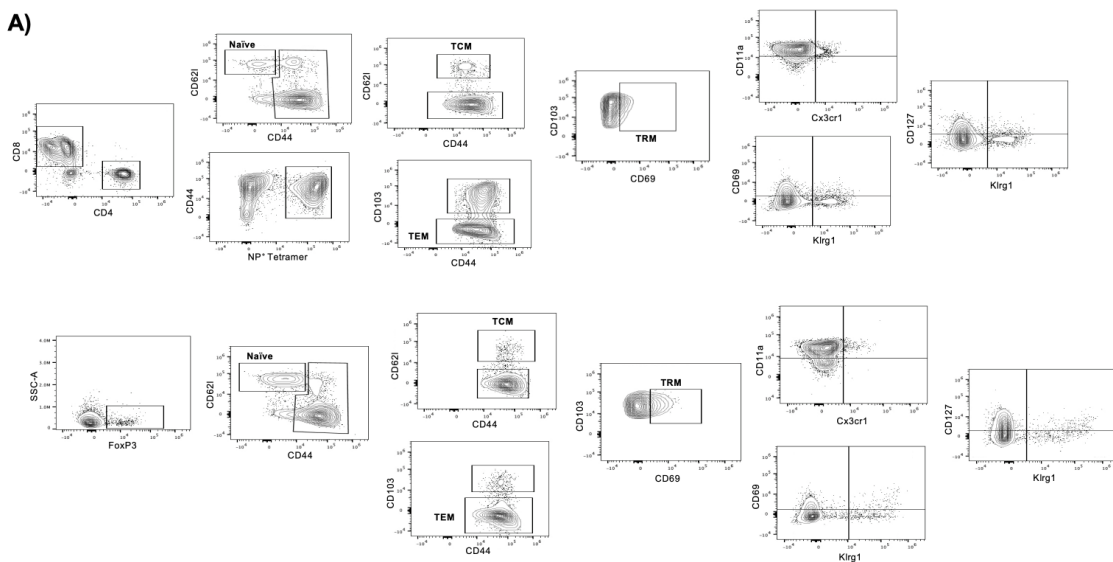

**B)**

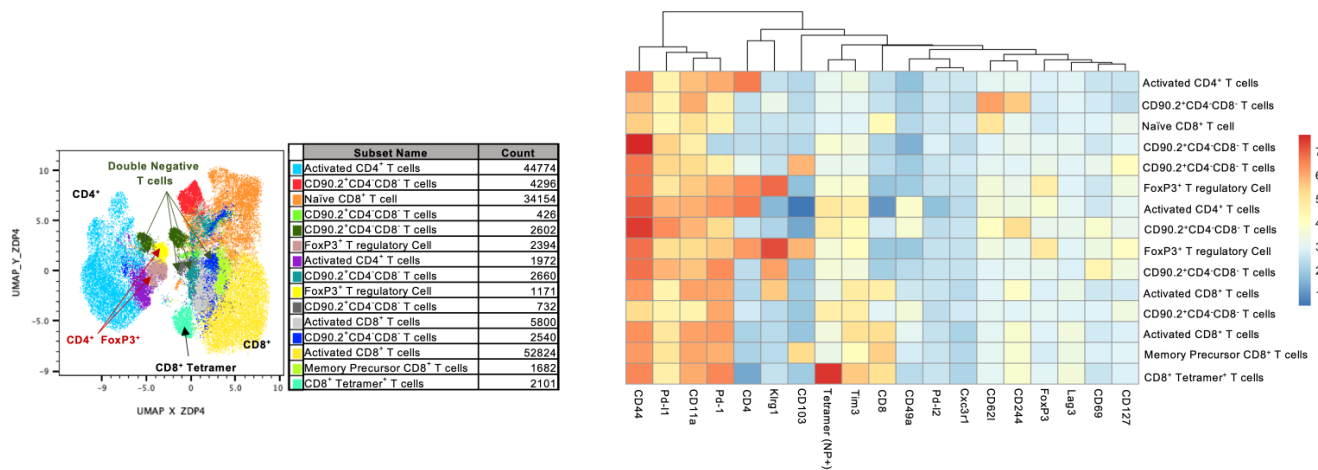

**C)**

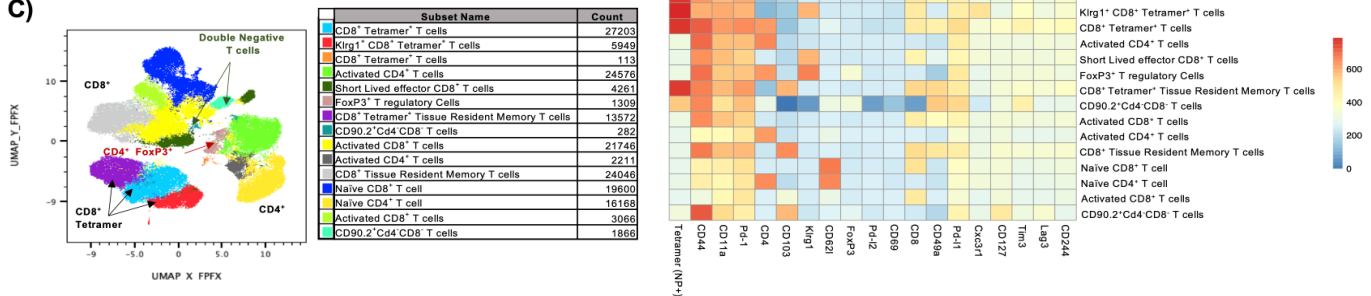

**Supplemental Figure 2. Gating strategy for T cell compartment analysis and flow cytometry analysis for acute and memory influenza alone infections. A) T cells were initially gated on CD90.2<sup>+</sup>CD45<sup>+</sup>Live cells and further gated to parse out changes in CD4<sup>+</sup> and CD8<sup>+</sup> T cells. B) Flow cytometry analysis on acute influenza infected mouse lungs. Once gated samples were concatenated (n=3) and populations were visualized using FlowSOM and UMAP plugins in FlowJo. FlowSOM populations were further analyzed by conventional gating techniques to determine breakdown of T cell types. C) Flow cytometry analysis on memory influenza alone infected mice (n=4).**

### Supplemental Figure 3.

A)

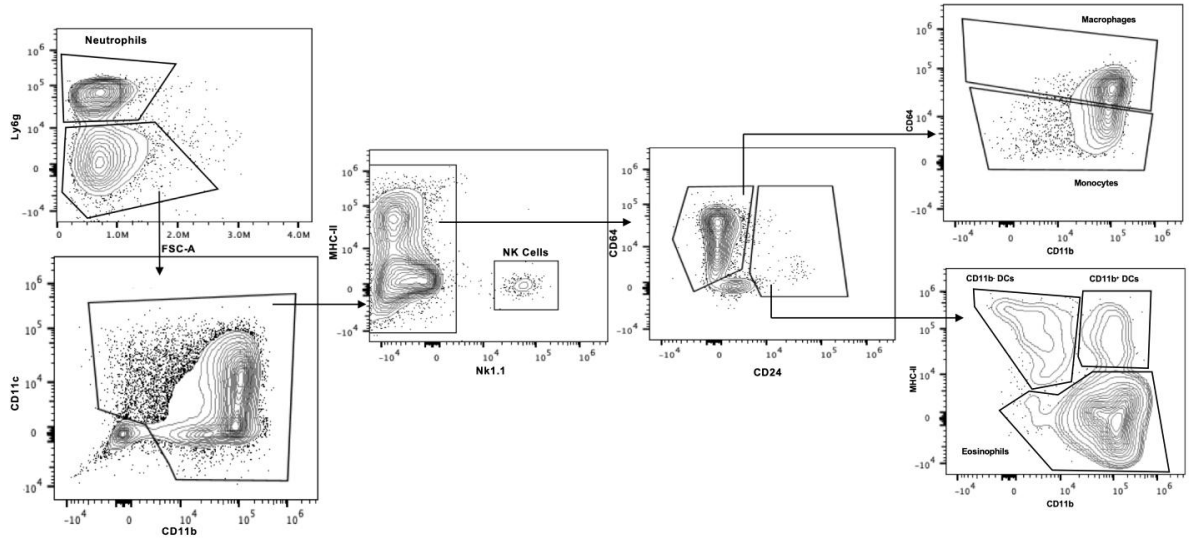

B)

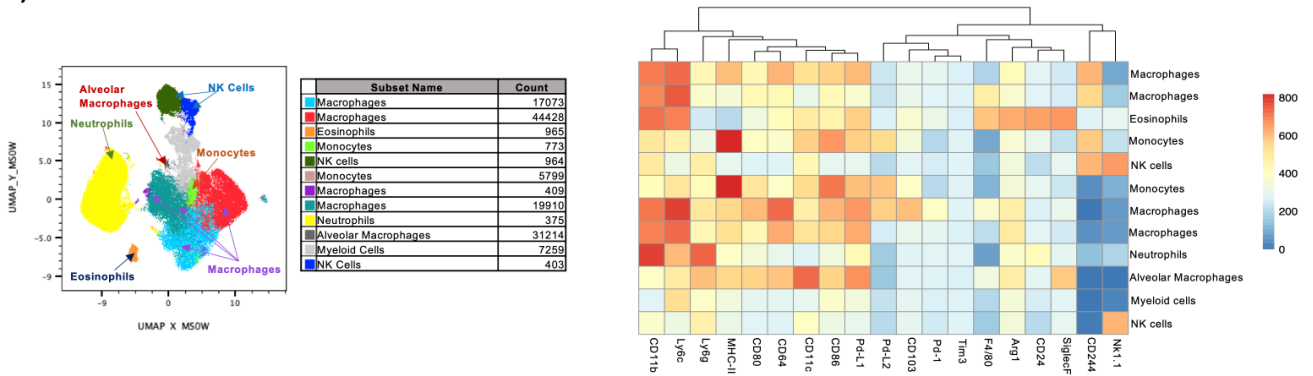

C)

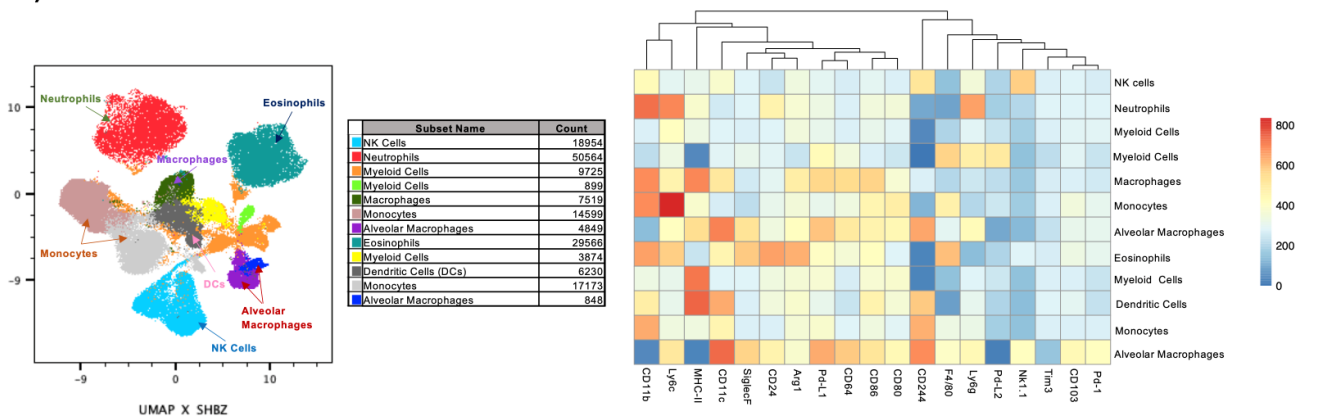

### Supplemental Figure 3. Gating strategy for myeloid cell subset analysis and flow cytometry analysis for acute and memory influenza alone infections..

Myeloid cells were initially gated on TCRB-B220-CD45<sup>+</sup>Live cells and further gated to determine changes in myeloid cell subsets. B) Flow cytometry analysis on acute influenza infected mouse lungs. Once gated samples were concatenated (n=3) and downsampled then visualized using FlowSOM and UMAP plugins in FlowJo. FlowSOM populations were further analyzed by conventional gating techniques to determine breakdown of myeloid cell types. C) Flow cytometry analysis on memory influenza alone infected mouse (n=4).
